# Supplementary material for: Reducing sugars facilitated carbonyl condensation in detoxification of carbonyl aldehyde model compounds for bioethanol fermentation
Source: Royal Society of Chemistry journal article supplement (doi:10.1039/c2ra21163g), 2012-01-01
Supplement: c2ra21163g.pdf [file c2ra21163g.pdf]

**Electronic supplementary information (ESI):**

**Reducing sugars facilitated carbonyl condensation in detoxification of carbonyl aldehyde model compounds for bioethanol fermentation**

Rui Xie<sup>a</sup>, Maobing Tu<sup>\*a</sup>, Yonnie Wu<sup>b</sup>, Steven Taylor<sup>c</sup>

<sup>a</sup>Forest Products Lab and Center for Bioenergy and Bioproducts, Auburn University, 520 Devall Drive, Auburn, AL, 36849, U.S.

<sup>b</sup>Department of Chemistry and Biochemistry, Auburn University, 172 Chemistry building, Auburn, AL, 36849, U.S.

<sup>c</sup>Department of Biosystems Engineering, Auburn University, Auburn, AL, 36849, U.S.

\* Corresponding author

Email address: [mtu@auburn.edu](mailto:mtu@auburn.edu)

Fax: +1 334 844 1084; Tel: +1 334 844 8829

**Table S1 Colony Forming Units (CFU) of *Saccharomyces cerevisiae* on YDP agar plates (in the presence of 0 mM (M9 control), 0.02 mM, 0.1 mM, 0.5mM and 1.0 mM Ortho-phthalaldehyde at 30°C)**

| Incubation time | M9 ( $\times 10^5$ ) | 0.02mM ( $\times 10^5$ ) | 0.1mM ( $\times 10^5$ ) | 0.5mM ( $\times 10^5$ ) | 1mM ( $\times 10^5$ ) |
|-----------------|----------------------|--------------------------|-------------------------|-------------------------|-----------------------|
| 0 h             | 157                  | 151                      | 19                      | 0                       | 0                     |
| 12 h            | 730                  | 510                      | 4.0                     | 0                       | 0                     |
| 24 h            | 1070                 | 1470                     | 8.1                     | 0                       | 0                     |
| 48 h            | 4000                 | 1400                     | 206                     | 0.2                     | 0                     |

**Table S2 The change of pH during the alkaline treatment of 1.0 mM OPA with different sugars (2h, 60°C)**

| Samples | Initial | pH adjusting <sup>a</sup> | 30 min | pH adjusting | 60 min | pH adjusting | 90 min | pH adjusting | 120 min |
|---------|---------|---------------------------|--------|--------------|--------|--------------|--------|--------------|---------|
| Glu/OPA | 6.3     | 10.0                      | 9.0    | 10.1         | 9.5    | 10.2         | 9.5    | 10.2         | 9.7     |
| Fru/OPA | 6.4     | 9.9                       | 8.2    | 9.9          | 8.2    | 9.9          | 8.1    | 10           | 8.7     |
| Suc/OPA | 6.3     | 10.5                      | 10.4   | 10.9         | 10.8   | 11.1         | 10.9   | 11.1         | 11      |

a: NaOH was added at the same level in each treatment to avoid the effect of salts on fermentation
